# Supplementary material for: Expression of NGF/proNGF and Their Receptors TrkA, p75NTR and Sortilin in Melanoma
Source: MDPI journal article supplement (doi:10.3390/ijms23084260), 2022-04-12
Supplement: s1 [file s1]

## Supplementary Data

### Expression of NGF/proNGF and their receptors TrkA, p75<sup>NTR</sup> and sortilin in melanoma

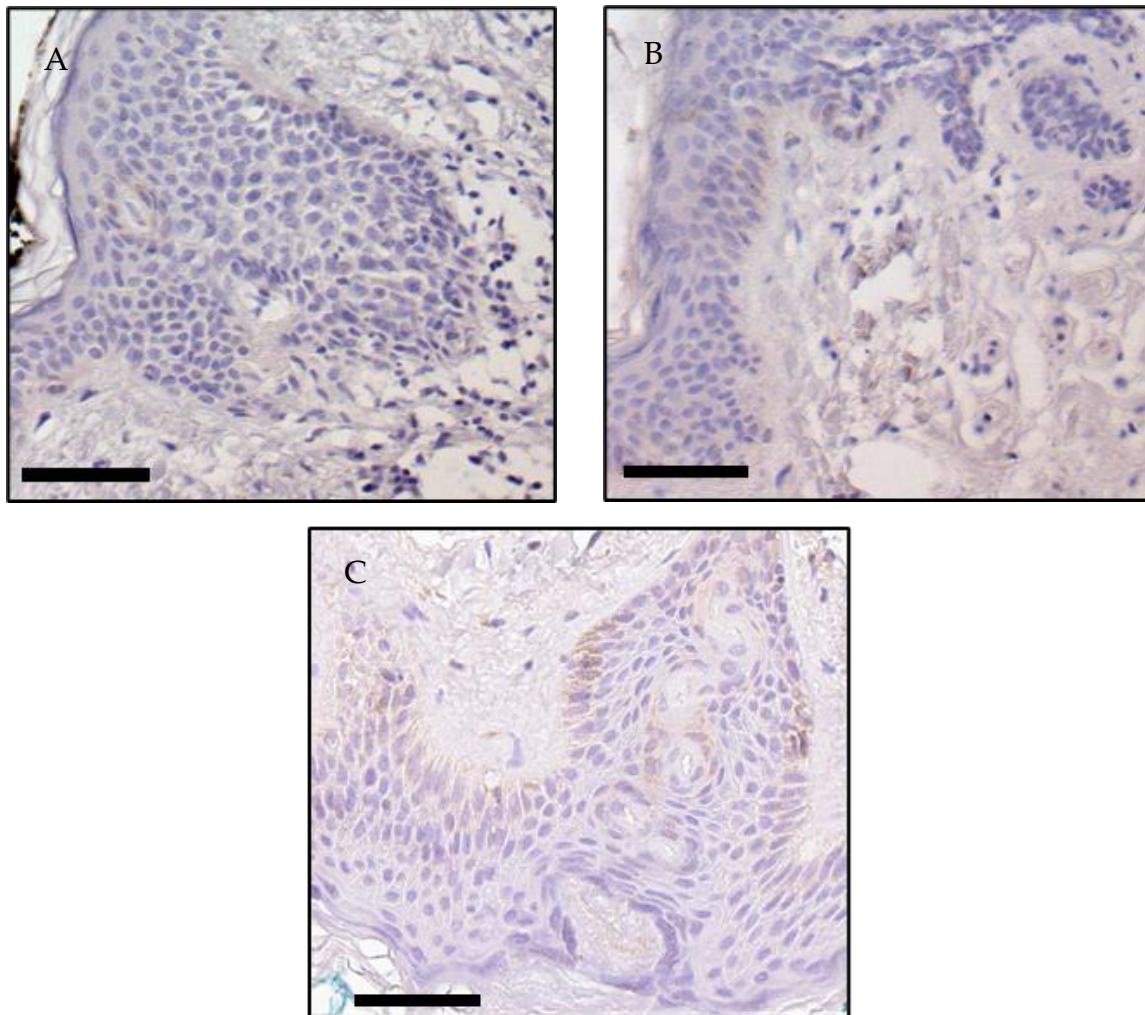

**Supplementary Figure S1.** Isotype negative controls for immunohistochemistry. (A) Immunostaining was performed without addition of any primary antibody. (B) Rabbit (DA1E) mAb IgG Isotype control (diluted to match highest primary antibody concentration; catalogue number 3900S, Cell Signaling Technology, Danvers, MA, USA). (C) Rabbit IgG, purified serum nonimmune, isotype control (diluted to match highest primary antibody concentration; catalogue number 20009, Alpha Diagnostic International). Scale bar = 90 $\mu$ m.
